# Supplementary material for: Genome-wide screening identifies cell-cycle control as a synthetic lethal pathway with SRSF2P95H mutation
Source: PubMed Central journal article supplement — Blood Adv. 2022 Mar 30;6(7):2092–106. doi: 10.1182/bloodadvances.2021004571 (PMC9006275; doi:10.1182/bloodadvances.2021004571), 2022-03-30

## Supplemental Method

### ***Srsf2*<sup>P95H/+</sup> CRISPR knockout pooled library screen**

At the start of the screen,  $130 \times 10^6$  Cas9 expressing cells from each cell line ( $n=3$  independently derived cell lines per genotype) were infected with the Brie CRISPR knockout pooled library (Virus aliquots provided by the Victorian Centre for Functional Genomics; Addgene #73633)<sup>39</sup>. The number of cells infected was calculated by multiplying the number of guides in the library (78,637) by the desired number of cells for each guide at the start of the experiment (aiming for 500 copies per sgRNA), divided by the multiplicity of infection required (MOI=0.3). For each cell line, the  $130 \times 10^6$  cells were separated into four T75 flasks (Nunc™) and, in each spin-infection flask,  $35 \times 10^6$  cells were mixed with 122 $\mu$ L of concentrated lentivirus containing the Brie library and 35 $\mu$ L of polybrene (8 $\mu$ g/mL, Sigma-Aldrich) in 35mL of IMDM-Cas9 media. The cells/virus mix was then spun at 1,100g for 90 minutes and the cells were re-incubated immediately after the spin-infection. Approximately 4 hours later, the mixture was transferred into two T-175 flasks (Falcon) with the addition of 65mL of IMDM-Cas9 media and cells were re-incubated. After 48 hours, cells were counted and diluted to  $8 \times 10^5$  cells/mL before adding puromycin (0.5 $\mu$ g/mL; Merck). After 4 days of puromycin selection, the puromycin and blasticidin were washed out and the cells were cultured in IMDM with 10%FBS, 1% GM-CSF and 400nM 4-hydroxy tamoxifen (Merck Millipore). This timepoint is labelled day 0 of the screen. The tamoxifen was removed from the cells after 4 days and cells were then passaged at  $2 \times 10^5$ /mL every 2 days or  $1 \times 10^5$ /mL for a 3-day interval for a total of 18 days. A minimum of  $40 \times 10^6$  cells was maintained during each passage. On day 0, day 4, day 11 and day 18 of the screen, pellets of  $40 \times 10^6$  cells were collected for gDNA isolation and library preparation.

**Data availability**

All datasets related to this work are deposited in GEO

(<https://www.ncbi.nlm.nih.gov/geo/query/acc.cgi?acc=GSE165506>).

## Supplemental Table

**Supp Table 1** Datasets used in comparison of *SRSF2/Srsf2* mis-spliced genes.

**Supp Table 2** Mapped read counts and coverage of 24 libraries in *Srsf2* CRISPR screen.

## Supplemental Figures

**Supp Figure 1** Generation and characterization of Hoxb8 *R26Cre-ERT2<sup>ki/+</sup>* GM-CSF and Cas9-blasticidin resistant Hoxb8 *R26Cre-ERT2<sup>ki/+</sup>* GM-CSF cell lines. (A) A schematic diagram illustrating the generation of Hoxb8 *R26Cre-ERT2<sup>ki/+</sup>* GM-CSF and Cas9-blasticidin resistant Hoxb8 *R26Cre-ERT2<sup>ki/+</sup>* GM-CSF cell lines. (B) FACS plot of Hoxb8 GM-CSF cells stained with antibodies against CD11b and Gr-1. (C) Cas9 Hoxb8 GM-CSF *Srsf2<sup>+/+</sup>* and *Srsf2<sup>P95H/+</sup>* cell lines have similar proliferation rates (n=3 per genotype). (D) Cas9 Hoxb8 GM-CSF *Srsf2<sup>P95H/+</sup>* cells achieve full recombination after 4 days of 400nM tamoxifen treatment and remain stably recombined after tamoxifen withdrawal. Cas9 *Srsf2<sup>P95H/+</sup>* cell lines are: #243, #81 and #83. Cas9 *Srsf2<sup>+/+</sup>* cell lines are #281, #144 and #145.

**Supp Figure 2** Heatmap of top differentially expressed genes with absolute log fold change (absLogFC) >2 and FDR < 0.05 between Cas9 *Srsf2<sup>+/+</sup>* and *Srsf2<sup>P95H/+</sup>* cell lines (n=3).

**Supp Figure 3** The sample count distribution and gini index of *Srsf2* CRISPR screen. (A) Sample count distribution of sgRNA of all 24 libraries showing unbiased representation of sgRNA. (B) The Gini index of sgRNA in 24 libraries indicating fewer clones of the sgRNA pool remain as the screen progresses.

**Supp Figure 4** The correlation between all six individual cell lines across all timepoints of the screen. The color code and number in each box indicate the concordance between the two samples. The color scale is shown at the top right. A red color and number close to 1 means the two samples are near identical. In contrast, a blue color and number close to 0 means the two samples are not correlated.

**Supp Figure 5** Depletion of the CEG2 core essential genes at day 4 of the CRISPR screen. The top 10 depleted CEG2 essential genes are labelled. *Hoxb8* and *Csf2a* are highlighted in green and marked in blue dots. Grey dots: all the sgRNA identified; yellow dots: sgRNA targeting CEG2 essential genes.

**Supp Figure 6** CDK6 is a druggable target of *Srsf2*<sup>P95H</sup> cell lines. **(A)** The top 30 genes that are exclusively negatively selected in the *Srsf2*<sup>P95H/+</sup> cell lines at day 18. Genes are ranked by MaGeCK score from the lowest (the most negatively enriched) to highest. FDR<0.05 for *Srsf2*<sup>+/+</sup> cell lines, FDR<0.01 for *Srsf2*<sup>P95H/+</sup> cell lines. **(B)** The guide count for CDK2 sgRNA, and CDK4 sgRNA **(C)** in *Srsf2*<sup>+/+</sup> and *Srsf2*<sup>P95H/+</sup> cells show no depletion over the course of the screen. **(D)** *Srsf2*<sup>P95H/+</sup> cell lines are not sensitive to inhibition of mitochondrial OXPHOS targeting agents, Tigecycline and Mubritinib (n=2 independent lines per genotype).

**Supplemental files:**

**Dataset S1.** Gene level (a) and transcript level (b) expression of the GMCSF cells

**Dataset S2.** Splicing GMCSF cells (a) rMATS (b) PSI-sigma

**Dataset S3.** CRISPR results (a) Counts (b)

SRSF2\_Mageck\_MLE\_Screen\_Results\_reps\_combined (c)

[Combined\\_gene\\_results\\_annotated\\_MaGeCK](#)

| Dataset description                                                                                                             | Dataset URL                                                                                                                                 | Database, license, and accessibility information                                                                                         | Reference                      |
|---------------------------------------------------------------------------------------------------------------------------------|---------------------------------------------------------------------------------------------------------------------------------------------|------------------------------------------------------------------------------------------------------------------------------------------|--------------------------------|
| <b>Human datasets</b>                                                                                                           |                                                                                                                                             |                                                                                                                                          |                                |
| mRNA splicing data from primary CMML (n=13; 3 with <i>SRSF2</i> mutation) and AML (n=9; 5 with <i>SRSF2</i> mutation) patients* | Dataset retrieved from table S1 in the supplement                                                                                           | Available in the supplement information table S1                                                                                         | (Kim et al., 2015)             |
| mRNA profile of MDS-L cells (in triplicate) transfected with <i>Srsf2</i> P95H shRNA construct                                  | <a href="https://www.ncbi.nlm.nih.gov/geo/query/acc.cgi?acc=GSE61052">https://www.ncbi.nlm.nih.gov/geo/query/acc.cgi?acc=GSE61052</a>       | Publicly available at Gene Expression Omnibus (GEO): GSE61052.<br>Mis-spliced gene list available in the supplement information table S4 | (Komeno et al., 2015)          |
| mRNA profile of K562 CRISPR cell clones (with wild-type or mutant <i>SRSF2</i> , n=4 per genotype)                              | <a href="https://www.ncbi.nlm.nih.gov/geo/query/acc.cgi?acc=GSE71299">https://www.ncbi.nlm.nih.gov/geo/query/acc.cgi?acc=GSE71299</a>       | Publicly available at Gene Expression Omnibus (GEO): GSE71299<br>Mis-spliced gene list available in the supplement information table S1  | (Zhang et al., 2015)           |
| mRNA profile of primary MDS bone marrow samples (n=115)                                                                         | Dataset retrieved from table S7 in the supplement                                                                                           | Available in the supplement information tables S7                                                                                        | (Qiu et al., 2016)             |
| mRNA profile of primary CMML (n=20; 7 with <i>SRSF2</i> mutation) patients                                                      | Dataset retrieved from table SX-XIV in the supplement                                                                                       | Available in the supplement information tables SX-XIV                                                                                    | (Hurtado et al., 2018)         |
| <b>Murine datasets</b>                                                                                                          |                                                                                                                                             |                                                                                                                                          |                                |
| mRNA profiles of murine model (MP/LSK cells) expressing <i>Srsf2</i> WT and mutants*                                            | <a href="https://www.ncbi.nlm.nih.gov/geo/query/acc.cgi?acc=GSE65349">https://www.ncbi.nlm.nih.gov/geo/query/acc.cgi?acc=GSE65349</a>       | Publicly available at Gene Expression Omnibus (GEO): GSE65349<br>Mis-spliced gene list available in the supplement information table S1  | (Kim et al., 2015)             |
| mRNA profile of murine model (MP/LSK cells) expressing <i>Srsf2</i> WT or <i>Srsf2</i> <sup>P95H/+</sup> *                      | <a href="http://trace.ddbj.nig.ac.jp/DRASearch/submission?acc=DRA006224">http://trace.ddbj.nig.ac.jp/DRASearch/submission?acc=DRA006224</a> | Publicly available at DNA Data Bank of Japan repository: DRA006224<br>Mis-splicing gene list available in supplemental table 2           | (Kon et al., 2018)             |
| mRNA profile of murine model (sorted LK+ eYFP+ cells) expressing <i>Srsf2</i> WT or <i>Srsf2</i> <sup>P95H/+</sup> *            | <a href="https://www.ncbi.nlm.nih.gov/geo/query/acc.cgi?acc=GSE99852">https://www.ncbi.nlm.nih.gov/geo/query/acc.cgi?acc=GSE99852</a>       | Publicly available at Gene Expression Omnibus (GEO): GSE99852<br>Mis-splicing gene list available in supplemental dataset 2              | (Smeets et al., 2018)          |
| mRNA profile of Hoxb8 immortalised GM-CSF cell lines expressing <i>Srsf2</i> WT or <i>Srsf2</i> <sup>P95H/+</sup> *             | N/A                                                                                                                                         | Available in this manuscript                                                                                                             | Published with this manuscript |

\*These datasets contain mis-splicing data from two different cell/disease types

| Sample_name   | Mappability (%) | Total_reads | Mapped_reads | Average Coverage (Copy number /sgRNA) |
|---------------|-----------------|-------------|--------------|---------------------------------------|
| WT_D0_S144    | 85.72347        | 38583293    | 33074936     | 420.6                                 |
| WT_D4_S144    | 85.87031        | 34396145    | 29536075     | 375.6                                 |
| WT_D11_S144   | 84.44593        | 32585779    | 27517364     | 349.9                                 |
| WT_D18_S144   | 87.12968        | 36646854    | 31930287     | 406.0                                 |
| WT_D0_S145    | 86.08064        | 30683490    | 26412546     | 335.9                                 |
| WT_D4_S145    | 86.90123        | 34345631    | 29846775     | 379.6                                 |
| WT_D11_S145   | 84.85053        | 32027437    | 27175449     | 345.6                                 |
| WT_D18_S145   | 86.29772        | 30632262    | 26434944     | 336.2                                 |
| WT_D0_S281    | 85.63385        | 33078080    | 28326034     | 360.2                                 |
| WT_D4_S281    | 86.1783         | 32858200    | 28316637     | 360.1                                 |
| WT_D11_S281   | 85.12764        | 30345497    | 25832405     | 328.5                                 |
| WT_D18_S281   | 86.19909        | 37822483    | 32602635     | 414.6                                 |
| P95H_D0_S81   | 84.96886        | 26147819    | 22217505     | 282.5                                 |
| P95H_D4_S81   | 84.81972        | 34788027    | 29507107     | 375.2                                 |
| P95H_D11_S81  | 84.13214        | 32715519    | 27524267     | 350.0                                 |
| P95H_D18_S81  | 86.06658        | 32080958    | 27610984     | 351.1                                 |
| P95H_D0_S83   | 85.048          | 32903333    | 27983628     | 355.9                                 |
| P95H_D4_S83   | 85.34779        | 28279733    | 24136126     | 306.9                                 |
| P95H_D11_S83  | 84.42695        | 30106447    | 25417955     | 323.2                                 |
| P95H_D18_S83  | 85.38084        | 28122359    | 24011106     | 305.3                                 |
| P95H_D0_S243  | 85.01022        | 36751029    | 31242132     | 397.3                                 |
| P95H_D4_S243  | 85.58722        | 36307614    | 31074678     | 395.2                                 |
| P95H_D11_S243 | 85.15725        | 32322150    | 27524653     | 350.0                                 |
| P95H_D18_S243 | 86.3542         | 28848293    | 24911713     | 316.8                                 |

A.

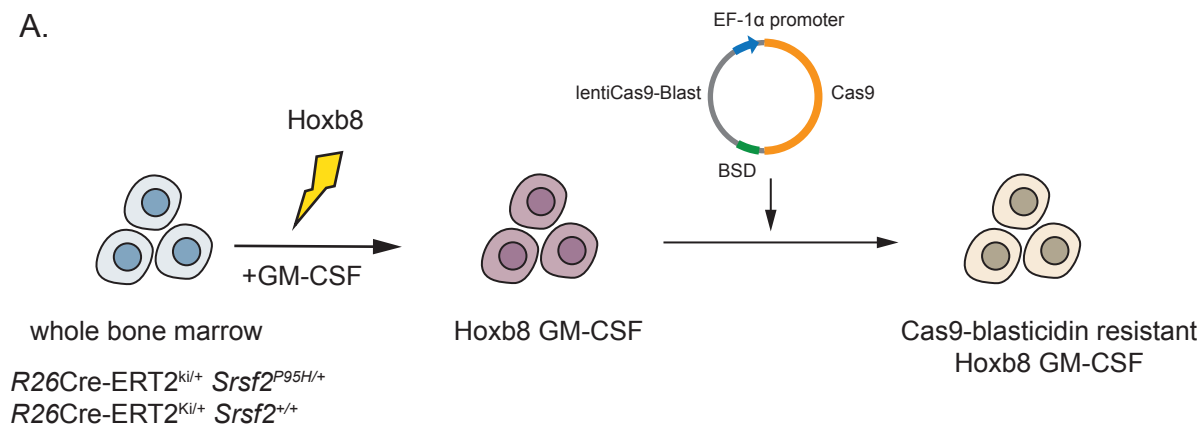

B.

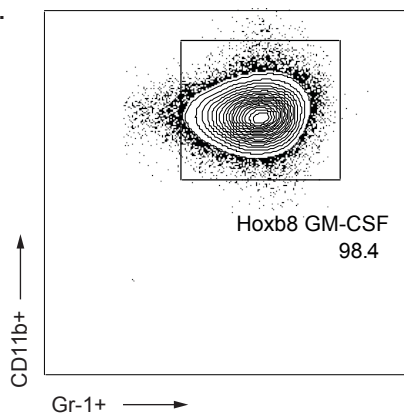

C.

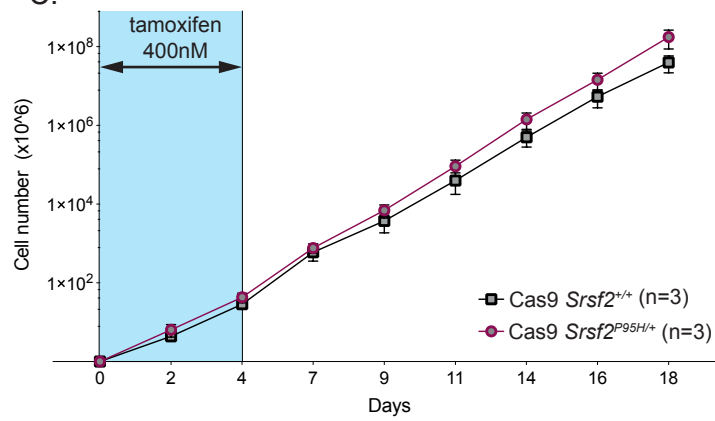

D.

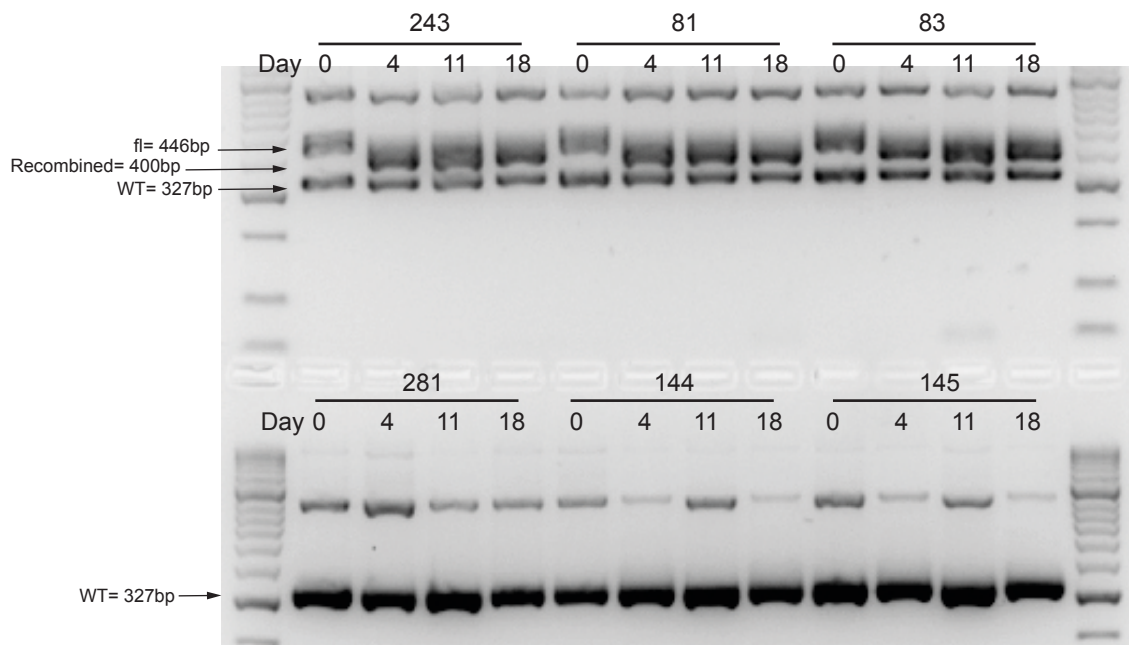



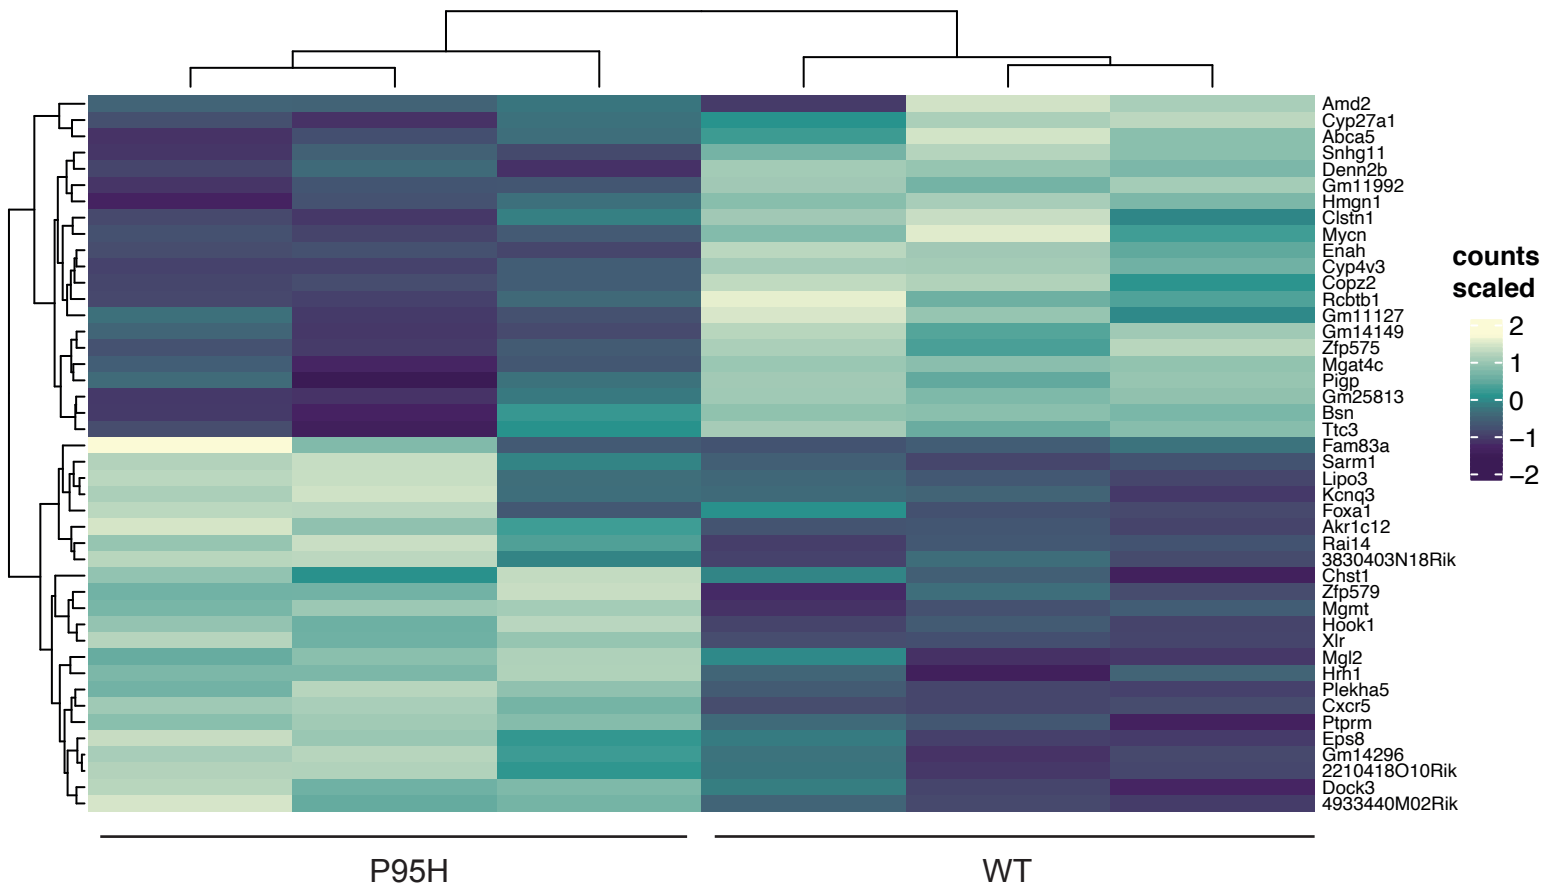

A. Sample count distribution

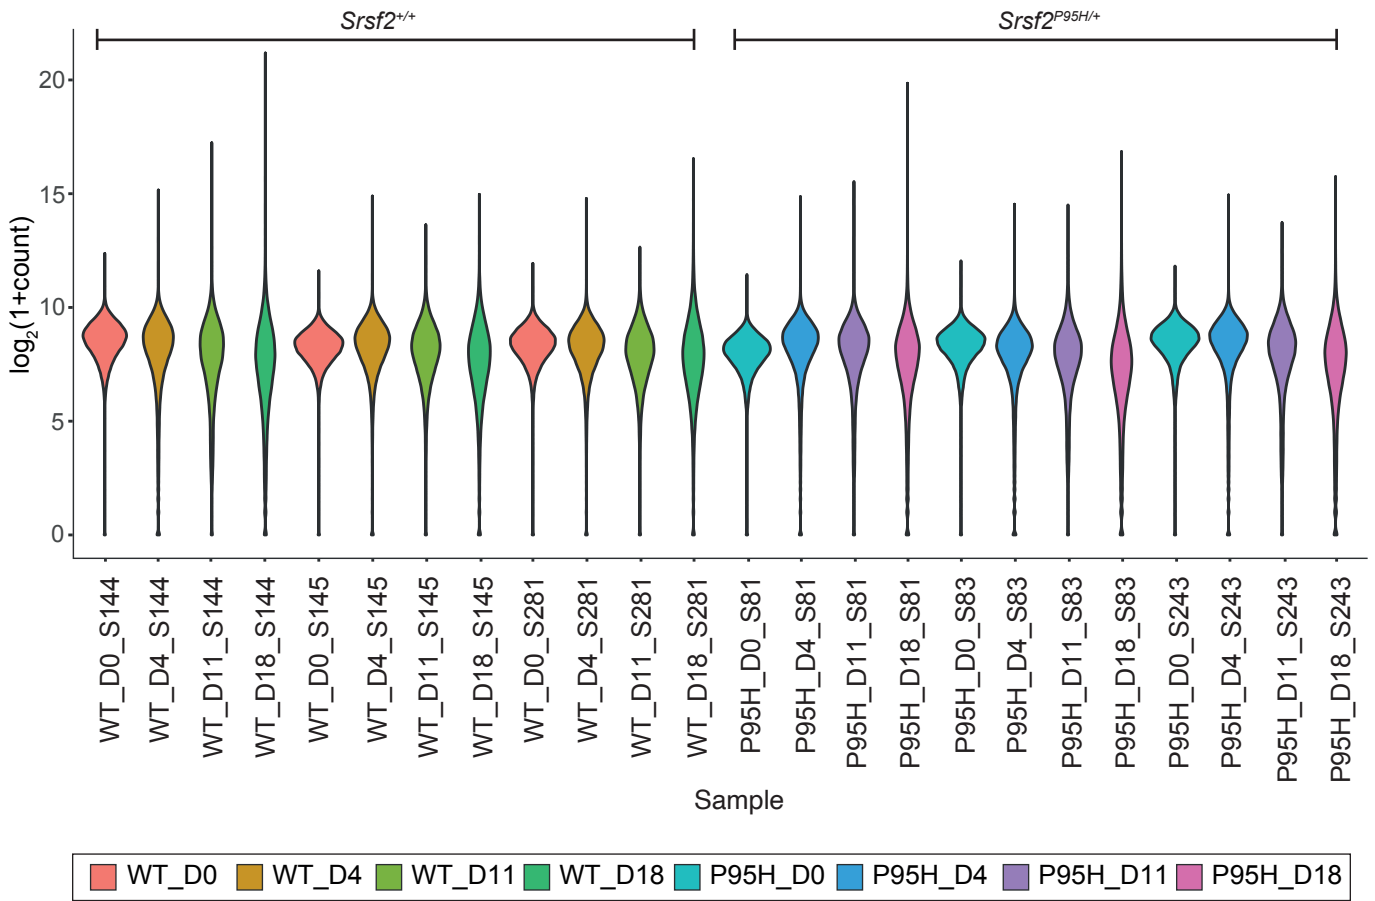

B. Gini index

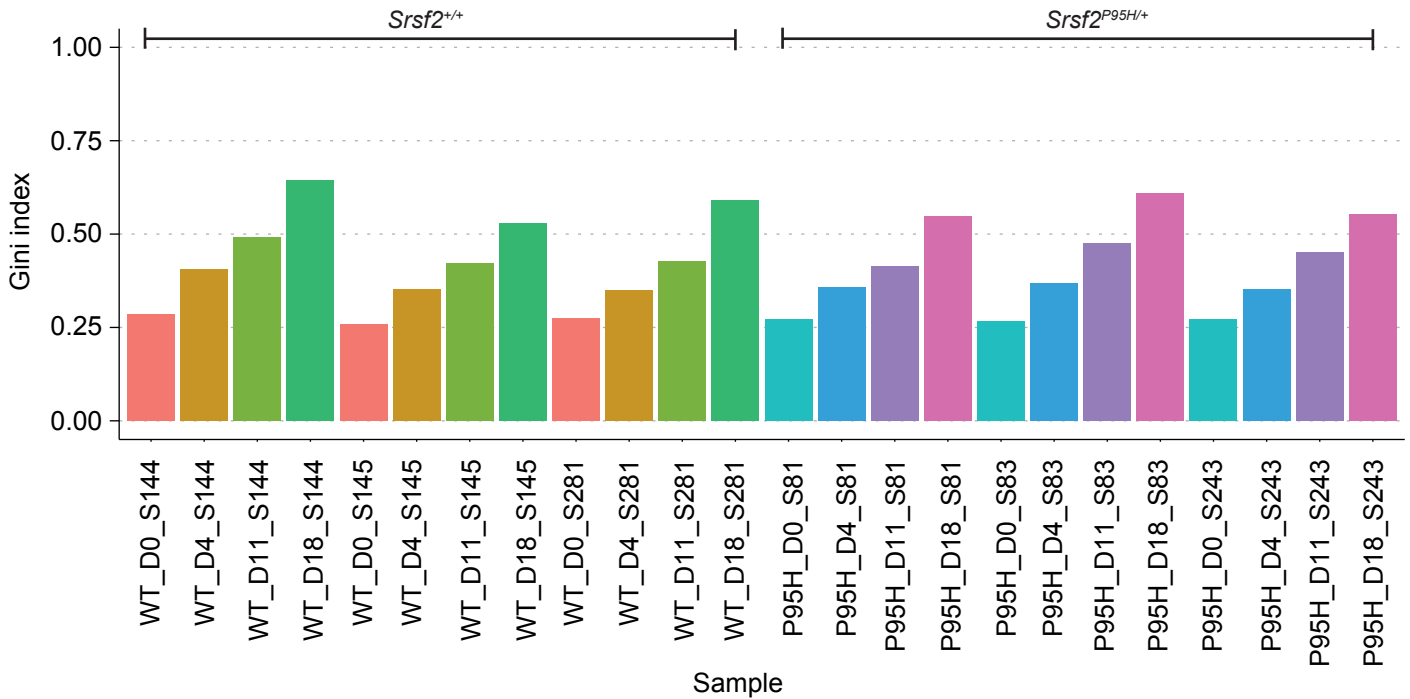

Supp figure 4 Xu et al., 2021

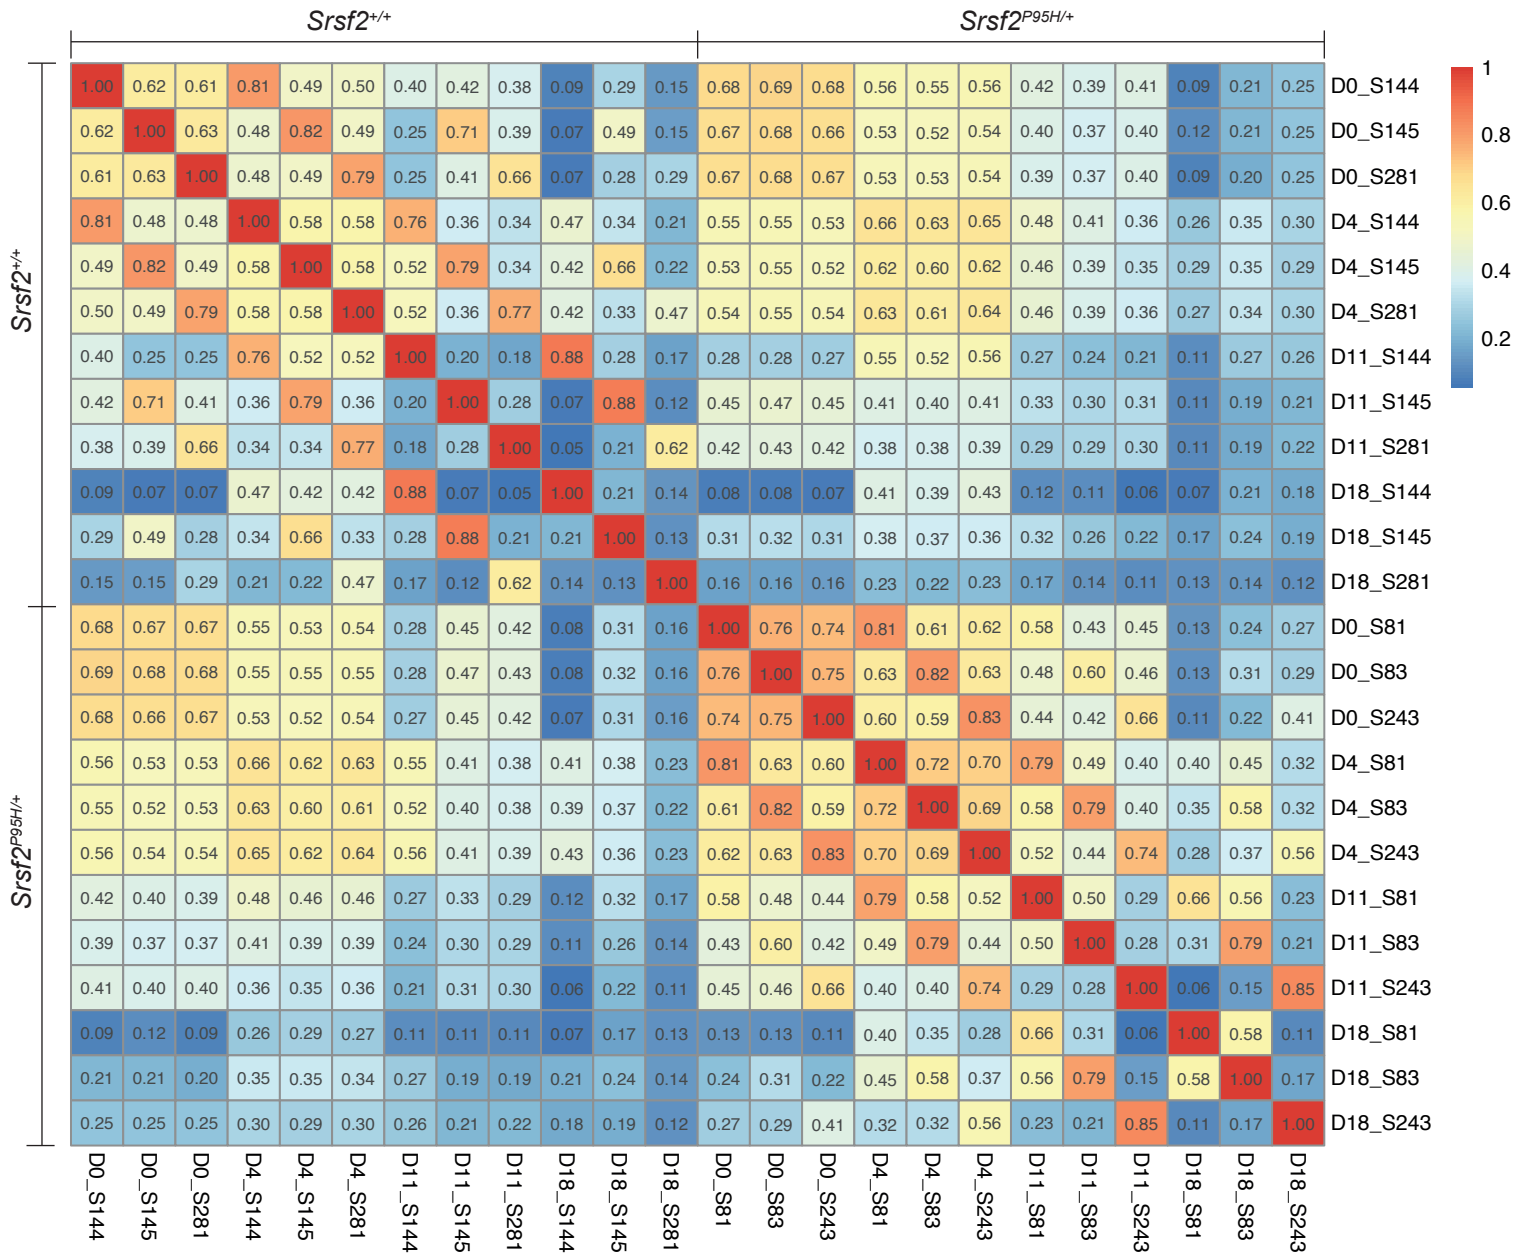

Day 4 (P95H vs WT)

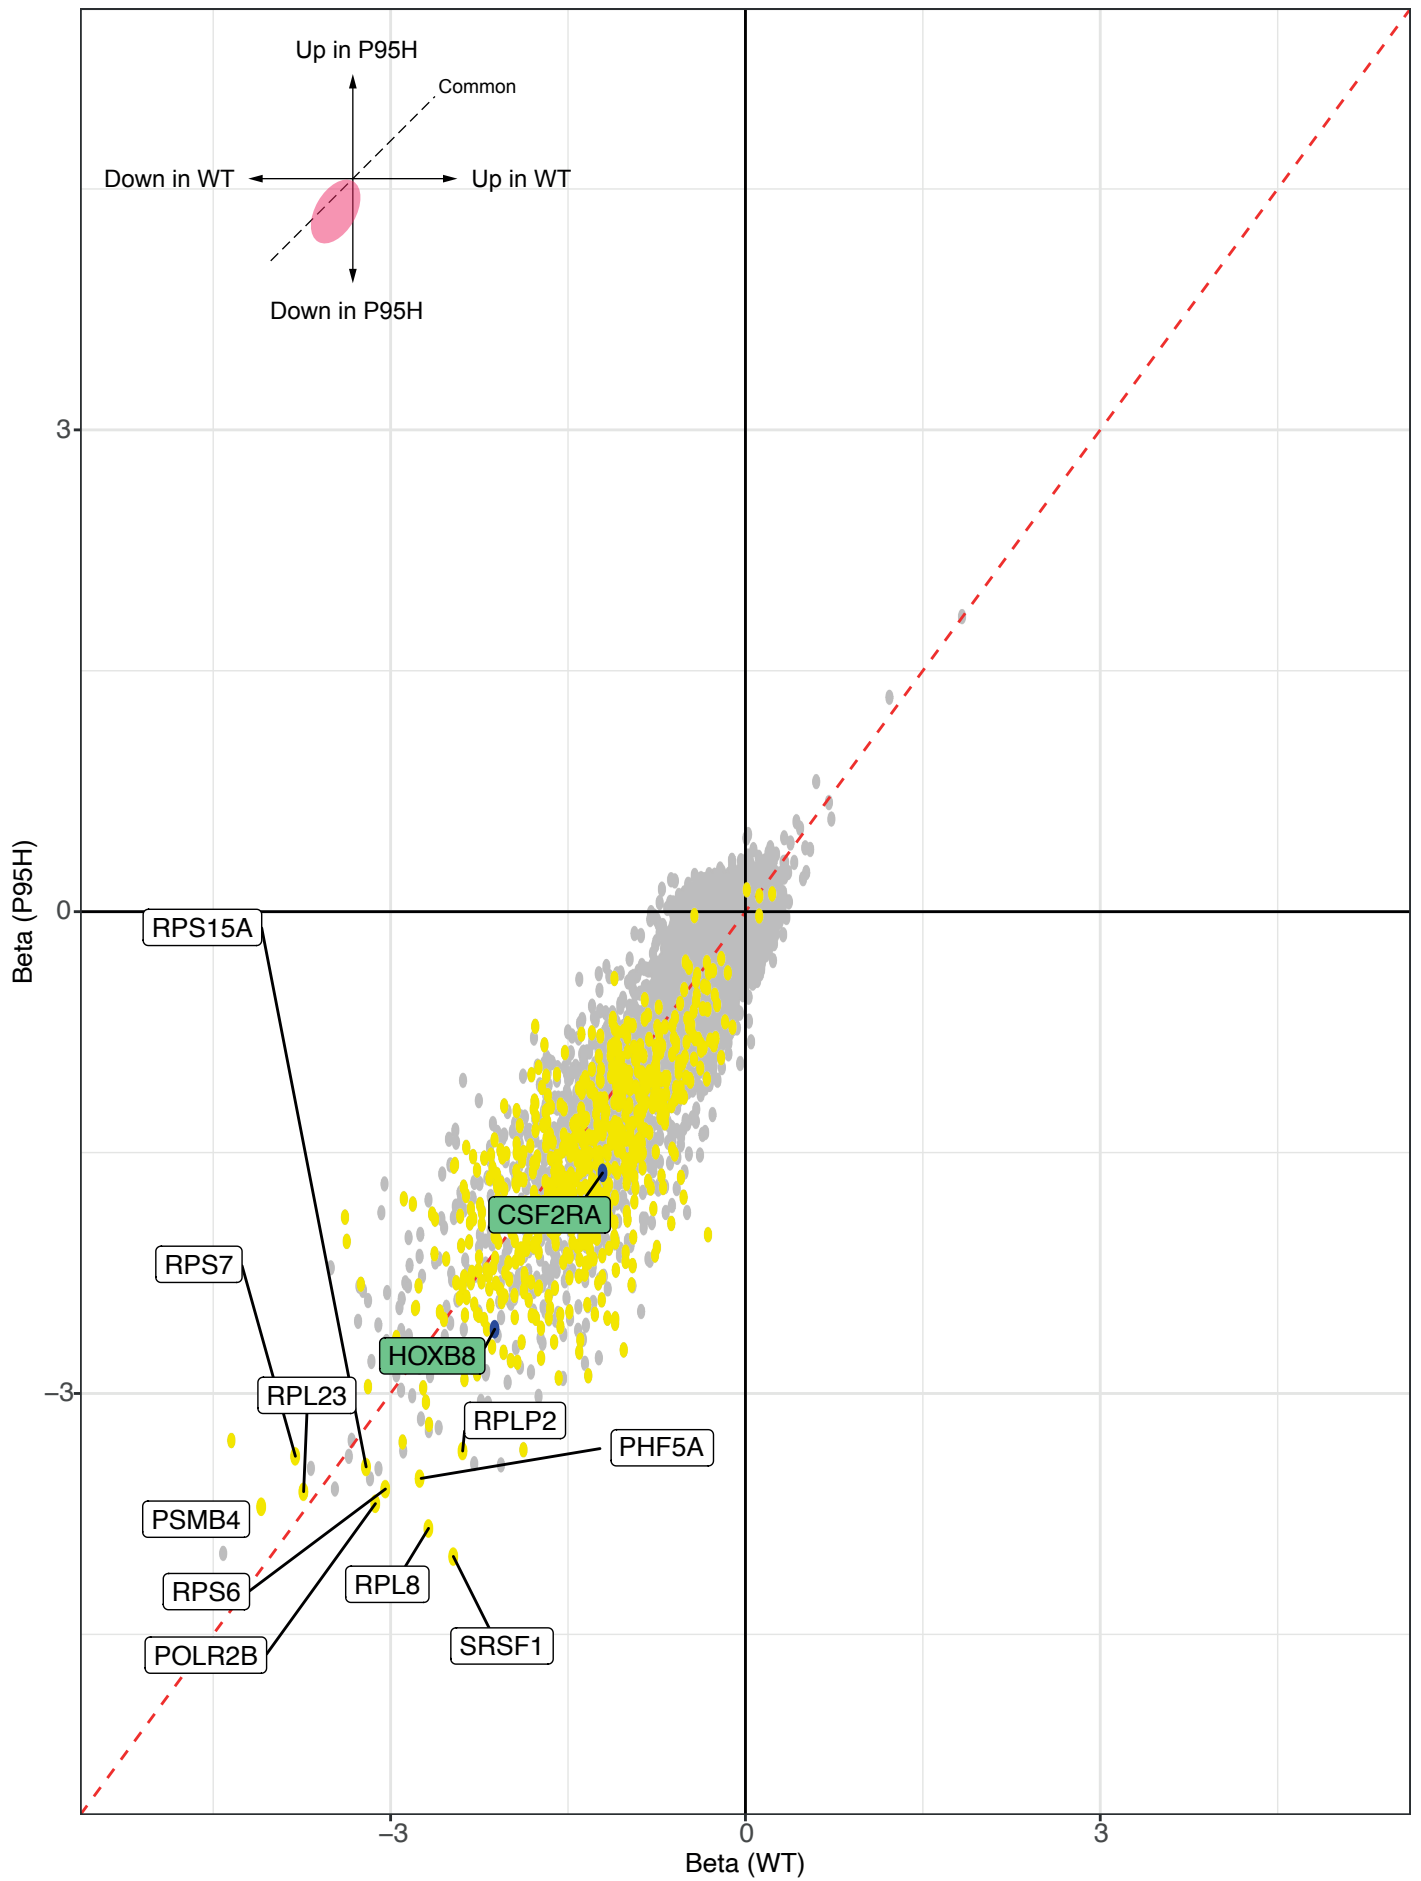

A.

| D18                | MaGeCK Score           |
|--------------------|------------------------|
| <i>Serf2</i>       | 4.60x10 <sup>-08</sup> |
| <i>Mogs</i>        | 5.90x10 <sup>-08</sup> |
| <i>Qrsl1</i>       | 1.46x10 <sup>-07</sup> |
| <i>Gcn11</i>       | 1.65x10 <sup>-07</sup> |
| <i>Dap3</i>        | 1.91x10 <sup>-07</sup> |
| <i>Mtmr9</i>       | 1.96x10 <sup>-07</sup> |
| <i>Nsun4</i>       | 2.56x10 <sup>-07</sup> |
| <i>Vars2</i>       | 3.12x10 <sup>-07</sup> |
| <i>Vps51</i>       | 4.72x10 <sup>-07</sup> |
| <i>Pstk</i>        | 5.27x10 <sup>-07</sup> |
| <i>Mrps17</i>      | 6.48x10 <sup>-07</sup> |
| <i>Dars2</i>       | 7.01x10 <sup>-07</sup> |
| <i>Pkmyt1</i>      | 7.14x10 <sup>-07</sup> |
| <i>Mre11a</i>      | 7.41x10 <sup>-07</sup> |
| <i>Mrps27</i>      | 1.14x10 <sup>-06</sup> |
| <i>Asf1a</i>       | 1.18x10 <sup>-06</sup> |
| <i>Rpl21</i>       | 1.39x10 <sup>-06</sup> |
| <i>Rad50</i>       | 1.39x10 <sup>-06</sup> |
| <i>Lias</i>        | 1.94x10 <sup>-06</sup> |
| <i>Uqcrc1</i>      | 1.94x10 <sup>-06</sup> |
| <i>Cox6b1</i>      | 1.97x10 <sup>-06</sup> |
| <i>Atp5a1</i>      | 2.20x10 <sup>-06</sup> |
| <i>Wdr83</i>       | 2.27x10 <sup>-06</sup> |
| <i>Uqcc2</i>       | 2.80x10 <sup>-06</sup> |
| <i>Ptar1</i>       | 2.97x10 <sup>-06</sup> |
| <i>Ankrd49</i>     | 3.00x10 <sup>-06</sup> |
| <i>Dynl1</i>       | 3.16x10 <sup>-06</sup> |
| <b><i>Cdk6</i></b> | 3.44x10 <sup>-06</sup> |
| <i>Ei24</i>        | 3.51x10 <sup>-06</sup> |
| <i>Elp5</i>        | 3.63x10 <sup>-06</sup> |

MaGeCK score

B.

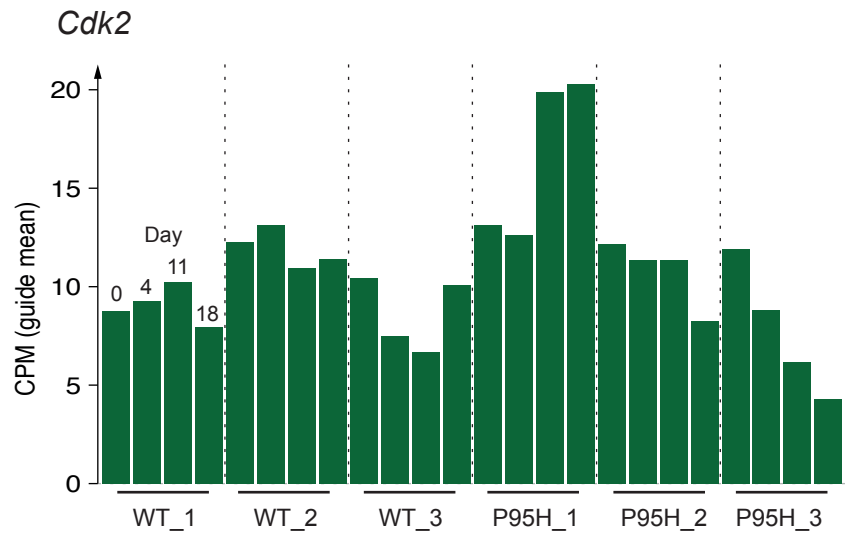

C.

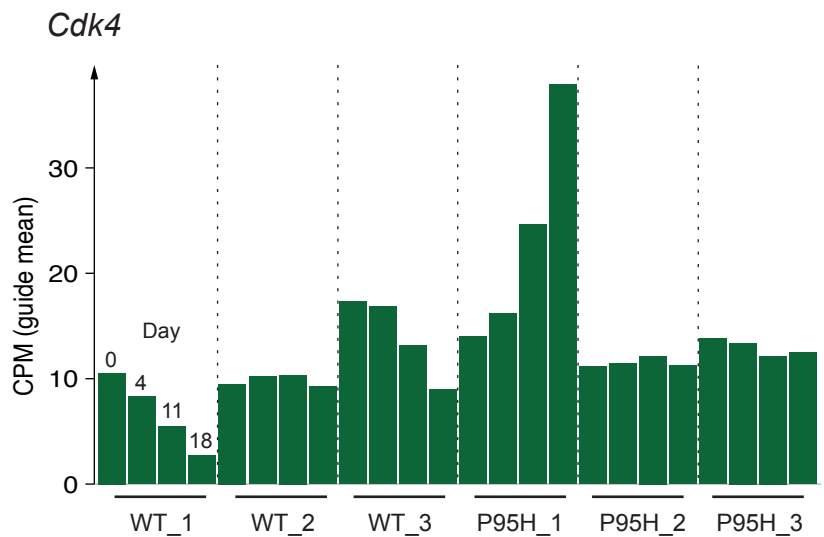

D.

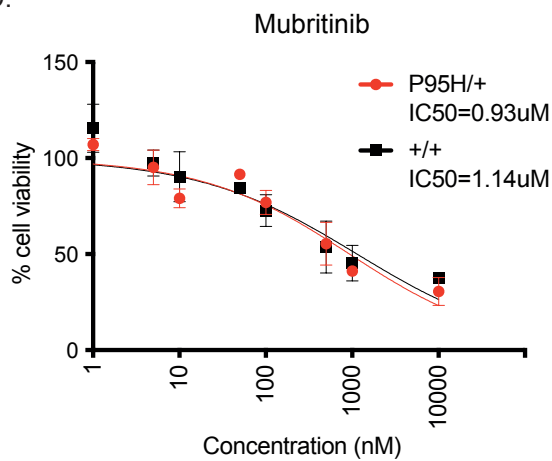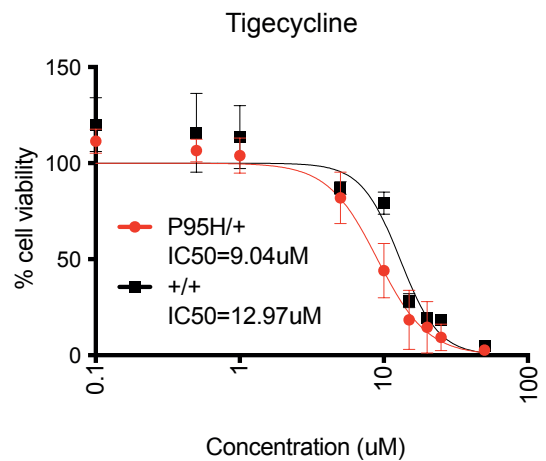

Supplement: advancesADV2021004571-suppl1.pdf [file advancesADV2021004571-suppl1.pdf]
